# Supplementary material
Source: MDPI journal article supplement (https://www.mdpi.com/1424-8247/16/6/893)
Supplement: s1 [file s1]

**Table S1.** The manufacturers' information given on the product label.

| Sample code | Sample type        | Botanical source              | Recommended daily dosage      | Number of dosage units | Product net weight | Gluten content labelling | Origin county  |
|-------------|--------------------|-------------------------------|-------------------------------|------------------------|--------------------|--------------------------|----------------|
| S1          | hard-shell capsule | Turmeric, Black pepper        | 2 capsules                    | 60                     | 24 g               | not labelled             | Croatia        |
| S2          | hard-shell capsule | Turmeric                      | 2 capsules                    | 60                     | 30 g               | not labelled             | Croatia        |
| S3          | hard-shell capsule | Turmeric                      | 2 capsules                    | 60                     | not labelled       | not labelled             | Italy          |
| S4          | hard-shell capsule | Turmeric, Black pepper        | 1 capsule with meal           | 30                     | 19 g               | not labelled             | Austria        |
| S5          | hard-shell capsule | Turmeric, Black pepper        | 2 capsules with meal          | 60                     | 35.22 g            | not labelled             | Croatia        |
| S6          | hard-shell capsule | Turmeric, Black pepper        | 6 capsules 45 min before meal | 60                     | not labelled       | gluten-free              | no information |
| S7          | hard-shell capsule | Turmeric                      | 1 capsule                     | 66                     | 77 g               | gluten-free              | Canada         |
| S8          | hard-shell capsule | Turmeric, Black pepper        | 2 capsules with meal          | 60                     | 30 g               | not labelled             | Netherlands    |
| S9          | hard-shell capsule | Turmeric, Black pepper        | 6 capsules                    | 60                     | not labelled       | not labelled             | Thailand       |
| S10         | hard-shell capsule | Turmeric                      | 3 capsules after meal         | 100                    | not labelled       | not labelled             | Thailand       |
| S11         | hard-shell capsule | Indian frankincense           | 2 capsules                    | 60                     | not labelled       | not labelled             | India          |
| S12         | hard-shell capsule | Indian frankincense           | 2 capsules with meal          | 60                     | not labelled       | gluten-free by origin    | India          |
| S13         | hard-shell capsule | Indian frankincense           | 2 capsules                    | 60                     | not labelled       | not labelled             | UK             |
| S14         | hard-shell capsule | Indian frankincense           | 2 capsules                    | 60                     | not labelled       | gluten-free              | India          |
| S15         | hard-shell capsule | Indian frankincense           | 1 capsule with meal           | 60                     | not labelled       | not labelled             | Croatia        |
| S16         | hard-shell capsule | Indian frankincense           | 2 capsules with meal          | 80                     | not labelled       | not labelled             | Croatia        |
| S17         | hard-shell capsule | Green chiretta                | 1 capsule                     | 60                     | not labelled       | gluten-free              | India          |
| S18         | hard-shell capsule | Green chiretta                | 2 capsules                    | 30                     | not labelled       | not labelled             | India          |
| S19         | hard-shell capsule | Green chiretta                | 4 capsules with meal          | 60                     | not labelled       | not labelled             | Thailand       |
| S20         | hard-shell capsule | Turmeric, Green chiretta      | 1 capsule with meal           | 60                     | not labelled       | gluten-free              | India          |
| S21         | hard-shell capsule | Turmeric, Black pepper        | 2 capsules after meal         | 60                     | 30 g               | gluten-free by origin    | Croatia        |
| S22         | hard-shell capsule | Turmeric, Indian frankincense | 2 capsules with meal          | 60                     | 58.8 g             | gluten-free              | Croatia        |
| S23         | hard-shell capsule | Turmeric, Green chiretta      | 2 capsules                    | 60                     | not labelled       | not labelled             | USA            |
| S24         | hard-shell capsule | Turmeric, Green chiretta      | 6 capsules with meal          | 60                     | not labelled       | not labelled             | USA            |
| S25         | hard-shell capsule | Turmeric, Indian frankincense | 3 capsules                    | 60                     | not labelled       | not labelled             | USA            |
| S26         | soft-shell capsule | Turmeric, Black pepper        | 1 capsule with meal           | 30                     | not labelled       | not labelled             | Croatia        |

|     |                    |                                                |                       |                |              |                                             |                |
|-----|--------------------|------------------------------------------------|-----------------------|----------------|--------------|---------------------------------------------|----------------|
| S27 | soft-shell capsule | Turmeric                                       | 8 capsules            | 60             | 55 g         | not labelled                                | Belgium        |
| S28 | soft-shell capsule | Turmeric                                       | 1 capsule with meal   | 30             | 38.4 g       | not labelled                                | USA            |
| S29 | soft-shell capsule | Turmeric                                       | 1 capsule with meal   | 30             | 17.8 g       | not labelled                                | Croatia        |
| S30 | tablet             | Turmeric, Black pepper                         | 2 tablets before meal |                |              | not labelled                                | Thailand       |
| S31 | tablet             | Turmeric                                       | 1 tablet with meal    | 30             | 49 g         | not labelled                                | USA            |
| S32 | tablet             | Turmeric                                       | 2 tablets             |                |              | not labelled                                | UK             |
| S33 | tablet             | Turmeric, Black pepper                         | 10 tablets            | 300            | 90 g         | gluten-free with<br>"Cross Grain"<br>symbol | Germany        |
| S34 | tablet             | Indian frankincense                            | 2 tablets with meal   | 40             | 67.2 g       | not labelled                                | USA            |
| S35 | tablet             | Turmeric, Indian<br>frankincense               | 2 tablets before meal | 60             | Not labelled | not labelled                                | USA            |
| S36 | powder             | Turmeric, Indian<br>frankincense, Black pepper | not applicable        | not applicable | 100 g        | not labelled                                | India          |
| S37 | powder             | Turmeric, Black pepper                         | not applicable        | not applicable | 27 g         | not labelled                                | Netherlands    |
| S38 | powder             | Indian frankincense                            | not applicable        | not applicable | 100 g        | gluten-free                                 | India          |
| S39 | powder             | Green chiretta                                 | not applicable        | not applicable | 100 g        | gluten-free                                 | India          |
| S40 | powder             | Green chiretta                                 | not applicable        | not applicable | 100 g        | gluten-free                                 | India          |
| S41 | powder             | Green chiretta                                 | not applicable        | not applicable | 100 g        | gluten-free                                 | India          |
| S42 | powder             | Black pepper                                   | not applicable        | not applicable | 100 g        | gluten-free                                 | India          |
| S43 | powder             | Turmeric                                       | not applicable        | not applicable | 200 g        | not labelled                                | Croatia        |
| S44 | powder             | Turmeric                                       | not applicable        | not applicable | 100 g        | not labelled                                | Germany        |
| S45 | powder             | Turmeric                                       | not applicable        | not applicable | 100 g        | not labelled                                | Croatia        |
| S46 | powder             | Turmeric                                       | not applicable        | not applicable | 100 g        | not labelled                                | Croatia        |
| S47 | powder             | Turmeric                                       | not applicable        | not applicable | 100 g        | gluten might be<br>present in traces        | Austria        |
| S48 | powder             | Turmeric                                       | not applicable        | not applicable | 50 g         | not labelled                                | Croatia        |
| S49 | resin              | Indian frankincense                            | not applicable        | not applicable | 100 g        | not labelled                                | Greece         |
| S50 | resin              | Indian frankincense                            | not applicable        | not applicable | 200 g        | not labelled                                | Turkey         |
| S51 | resin              | Indian frankincense                            | not applicable        | not applicable | 100 g        | not labelled                                | no information |
| S52 | tincture           | Turmeric                                       | 1.2 ml                | not applicable | 50 mL        | not labelled                                | Bulgaria       |
| S53 | tincture           | Turmeric                                       | 60 drops              | not applicable | 50 mL        | not labelled                                | Croatia        |

**Table S2.** Residual solvents investigated in dietary supplements solid dosage forms and dietary supplements ingredients according to protocol described in USP 43-NF 38 guideline, <467> chapter “Residual Solvents”.

| Residual Solvent                 | Retention time ( $t_R$ , min) | Peak area (AUC, pA/s) |
|----------------------------------|-------------------------------|-----------------------|
| <b>Class 2</b>                   |                               |                       |
| methanol                         | 2.90                          | 19.58                 |
| acetonitrile                     | 5.06                          | 6.71                  |
| methylene chloride               | 5.36                          | 73.26                 |
| <i>trans</i> -1,2-dichloroethene | 5.95                          | 398.13                |
| <i>cis</i> -1,2-dichloroethene   | 8.67                          | 265.43                |
| tetrahydrofuran                  | 9.72                          | 53.82                 |
| cyclohexane                      | 10.63                         | 7161.08               |
| methylcyclohexane                | 16.92                         | 2275.34               |
| 1,4-dioxane                      | 18.81                         | 3.38                  |
| toluene                          | 23.99                         | 1003.53               |
| chlorobenzene                    | 28.22                         | 202.04                |
| ethylbenzene                     | 28.55                         | 446.10                |
| <i>m</i> -xylene                 | 28.84                         | 1837.40               |
| <i>p</i> -xylene                 | 28.84                         | 1837.40               |
| <i>o</i> -xylene                 | 29.74                         | 179.80                |
| hexane                           | 6.59                          | 1466.82               |
| nitromethane                     | 8.51                          | 1.85                  |
| chloroform                       | 9.84                          | 19.10                 |
| 1,2-dimethoxyethane              | 12.47                         | 4.94                  |
| trichloroethane                  | 15.76                         | 94.95                 |
| pyridine                         | 23.85                         | 11.88                 |
| 2-hexanone                       | 26.49                         | 20.71                 |
| tetralin                         | 36.48                         | 192.80                |
| <i>n</i> -pentane                | 3.26                          | 42.40                 |
| <b>Class 3</b>                   |                               |                       |

|                                 |       |          |
|---------------------------------|-------|----------|
| ethanol                         | 3.27  | 11313.40 |
| diethyl ether                   | 3.83  | 93.00    |
| acetone                         | 3.99  | 3425.50  |
| 2-propanol                      | 4.47  | 288.80   |
| ethyl formate                   | 4.74  | 720.00   |
| methyl acetate                  | 5.09  | 383.90   |
| methyl <i>tert</i> -butyl ether | 5.87  | 3655.00  |
| 1-propanol                      | 7.31  | 158.10   |
| 2-butanone                      | 8.66  | 386.30   |
| ethyl acetate                   | 8.94  | 571.70   |
| 2-butanol                       | 9.53  | 246.40   |
| isopropyl acetate               | 12.22 | 266.80   |
| isobutanol                      | 12.82 | 1204.00  |
| <i>n</i> -heptane               | 13.60 | 14751.20 |
| 1-butanol                       | 16.41 | 198.80   |
| propyl acetate                  | 19.68 | 1013.60  |
| 4-methyl-2-pentanone            | 23.50 | 1109.00  |
| 3-methyl-1-butanol              | 24.28 | 258.80   |
| isobutyl acetate                | 24.93 | 1711.40  |
| 1-pentanol                      | 25.95 | 226.30   |
| butyl acetate                   | 26.87 | 1316.90  |
| dimethyl sulfoxide              | 27.78 | 11469.40 |
| anisole                         | 30.67 | 1031.60  |

**Table S3.** HSS-GC-FID method validation data.

| Analyte              | Retention time ( $t_R$ , min/ RSD, <sup>1</sup> %) | Linearity range (ppm) <sup>2</sup> | Regression equation      | $r^3$  | LOD <sup>4</sup> | LOQ <sup>5</sup> |
|----------------------|----------------------------------------------------|------------------------------------|--------------------------|--------|------------------|------------------|
| ethanol              | 3.73 / 0.24                                        | 1000-50000                         | $y = 8.0136x + 0.3595$   | 0.9998 | 0.025%           | 0.075%           |
| methanol             | 2.77 / 0.37                                        | 3-3600                             | $y = 0.00042x - 0.00050$ | 0.9999 | 0.50 ppm         | 1.5 ppm          |
| acetone              | 4.31 / 0.11                                        | 5-6000                             | $y = 0.00193x - 0.00139$ | 0.9999 | 0.50 ppm         | 1.5 ppm          |
| isopropanol          | 4.53 / 0.08                                        | 5-6000                             | $y = 0.00106x - 0.00657$ | 0.9999 | 0.50 ppm         | 1.5 ppm          |
| <i>tert</i> -butanol | 5.06 / 0.37                                        | 5-6000                             | $y = 0.00230x - 0.00500$ | 0.9999 | 0.33 ppm         | 1.0 ppm          |
| 1-propranol          | 6.01 / 0.21                                        | 5-6000                             | $y = 0.00092x - 0.00358$ | 0.9999 | 0.50 ppm         | 1.5 ppm          |
| isobutanol           | 7.62 / 0.24                                        | 5-6000                             | $y = 0.00135x + 0.01049$ | 0.9999 | 0.33 ppm         | 1.0 ppm          |
| 1-butanol            | 8.36 / 0.41                                        | 5-6000                             | $y = 0.00087x + 0.00090$ | 0.9999 | 0.33 ppm         | 1.0 ppm          |

| Analyte              | Precision (RSD, %) <sup>6</sup> |                                    | Accuracy (Recovery and RSD, %) <sup>7</sup> |      |                    |      |                  |      |
|----------------------|---------------------------------|------------------------------------|---------------------------------------------|------|--------------------|------|------------------|------|
|                      | Repeatability ( $n = 6$ )       | Intermediate precision ( $n = 9$ ) | Low ( $n = 3$ )                             |      | Medium ( $n = 3$ ) |      | High ( $n = 3$ ) |      |
| ethanol              | 1.91                            | 3.68                               | 97.35                                       | 6.07 | 99.81              | 3.55 | 102.51           | 0.80 |
| methanol             | 3.65                            | 4.51                               | 104.55                                      | 6.70 | 96.28              | 2.03 | 101.84           | 2.14 |
| acetone              | 2.05                            | 2.88                               | 92.65                                       | 1.11 | 96.88              | 2.14 | 99.35            | 0.65 |
| isopropanol          | 4.88                            | 4.08                               | 110.00                                      | 0.30 | 96.69              | 2.15 | 97.52            | 2.44 |
| <i>tert</i> -butanol | 1.67                            | 4.81                               | 109.65                                      | 3.82 | 104.39             | 4.76 | 101.08           | 2.94 |
| 1-propranol          | 2.95                            | 3.48                               | 104.72                                      | 2.85 | 96.26              | 1.49 | 96.78            | 3.49 |
| isobutanol           | 2.38                            | 2.87                               | 101.11                                      | 3.05 | 101.57             | 1.75 | 96.80            | 3.40 |
| 1-butanol            | 4.76                            | 5.27                               | 93.65                                       | 4.40 | 97.36              | 2.87 | 95.71            | 4.28 |

<sup>1</sup>RSD – Relative Standard Deviation

<sup>2</sup>Linearity was examined on at least five concentration levels in three individual standard solution preparations from which a single regression line was constructed. For ethanol impurities the highest concentration level was 120% of the specification limit.

<sup>3</sup> $r$  – correlation coefficient

<sup>4</sup>LOD – Limit of Detection was determined using signal-to-noise value 3.

<sup>5</sup>LOQ – Limit of Quantitation was determined using signal-to-noise value 10.

<sup>6</sup>Repeatability was assessed analysing six individual samples of working solution (repeatability level: 2.5% for ethanol, 300 ppm for methanol and 500 ppm for other impurities) on the same day, while intermediate precision was examined on three individual samples over three days. The data are expressed as RSDs.

<sup>7</sup>Accuracy of the method was examined by analysis of standard solutions in triplicate on three concentration levels (low: 0.1% ethanol, 15 ppm methanol, 25 ppm other impurities; medium: 2.5% ethanol, 300 ppm methanol, 500 ppm other impurities; high: 5% ethanol, 3600 ppm methanol, 6000 ppm other impurities). The data are expressed both as recoveries and RSDs.

**Table S4.** GC/MS/MS method validation data.

| Analyte | Retention time ( $t_R$ , min/ RSD <sup>1</sup> , %) | Linearity range (ppm) <sup>2</sup> | Regression equation   | $r^3$ | LOD (ppm) <sup>4</sup> | LOQ (ppm) <sup>5</sup> |
|---------|-----------------------------------------------------|------------------------------------|-----------------------|-------|------------------------|------------------------|
| 2-CE    | 2.80                                                | 0.02-0.2                           | $y = 16470x + 44.757$ | 0.996 | 0.003                  | 0.009                  |

| Analyte | Precision (RSD, %) <sup>6</sup> |                                     | Accuracy (Recovery and RSD, %) <sup>7</sup> |                    |                  |
|---------|---------------------------------|-------------------------------------|---------------------------------------------|--------------------|------------------|
|         | Repeatability ( $n = 5$ )       | Intermediate precision ( $n = 10$ ) | Low ( $n = 3$ )                             | Medium ( $n = 3$ ) | High ( $n = 3$ ) |
| 2-CE    | 2.60                            | 7.24                                | 97.11                                       | 94.13              | 103.88           |

<sup>1</sup>RSD – Relative Standard Deviation

<sup>2</sup>Linearity was examined on at least five concentration levels in three individual standard solution preparations from which a single regression line was constructed.

<sup>3</sup> $r$  – correlation coefficient

<sup>4</sup>LOD – Limit of Detection was determined using signal-to-noise value 3.

<sup>5</sup>LOQ – Limit of Quantitation was determined using signal-to-noise value 10.

<sup>6</sup>Repeatability was assessed analysing five individual samples of working solution (repeatability level: 0.1 ppm) on the same day, while intermediate precision was examined on five individual samples over two days. The data are expressed as RSDs.

<sup>7</sup>Accuracy of the method was examined by analysis of standard solutions in triplicate on three concentration levels (low: 0.02 ppm; medium: 0.1 ppm; high: 0.2 ppm). The data are expressed both as recoveries and RSDs.

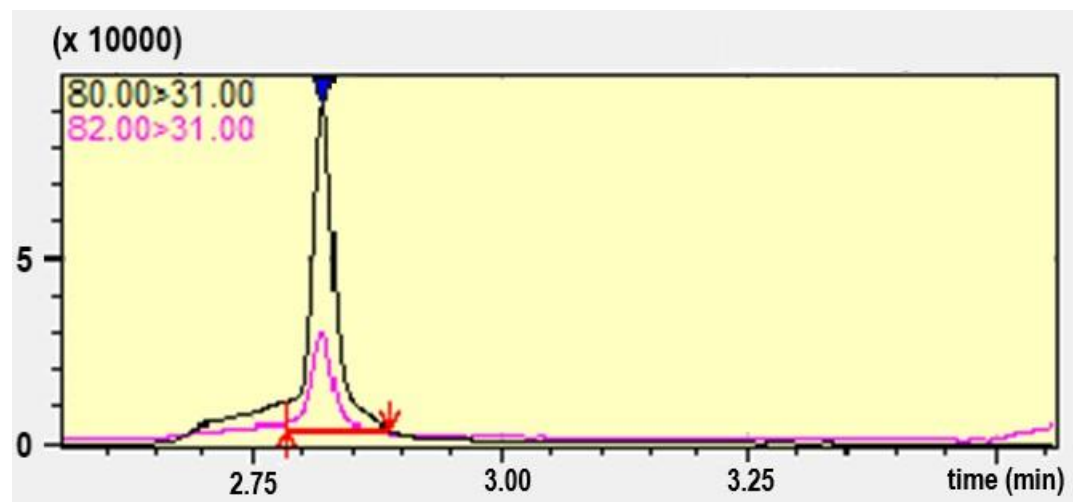

**Figure S1.** GC/MS/MS chromatogram of sample S35.

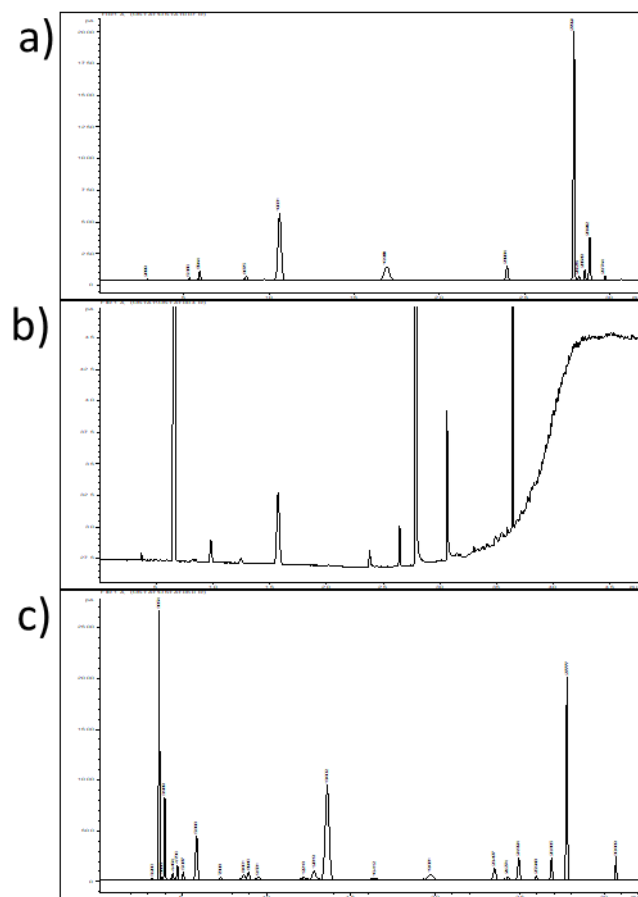

**Figure S2.** Chromatogram of Class 2 Mixture A Standard Solution (**a**), Class 2 Mixture B Standard Solution (**b**), and Class 3 Mixture A Standard Solution (**c**).



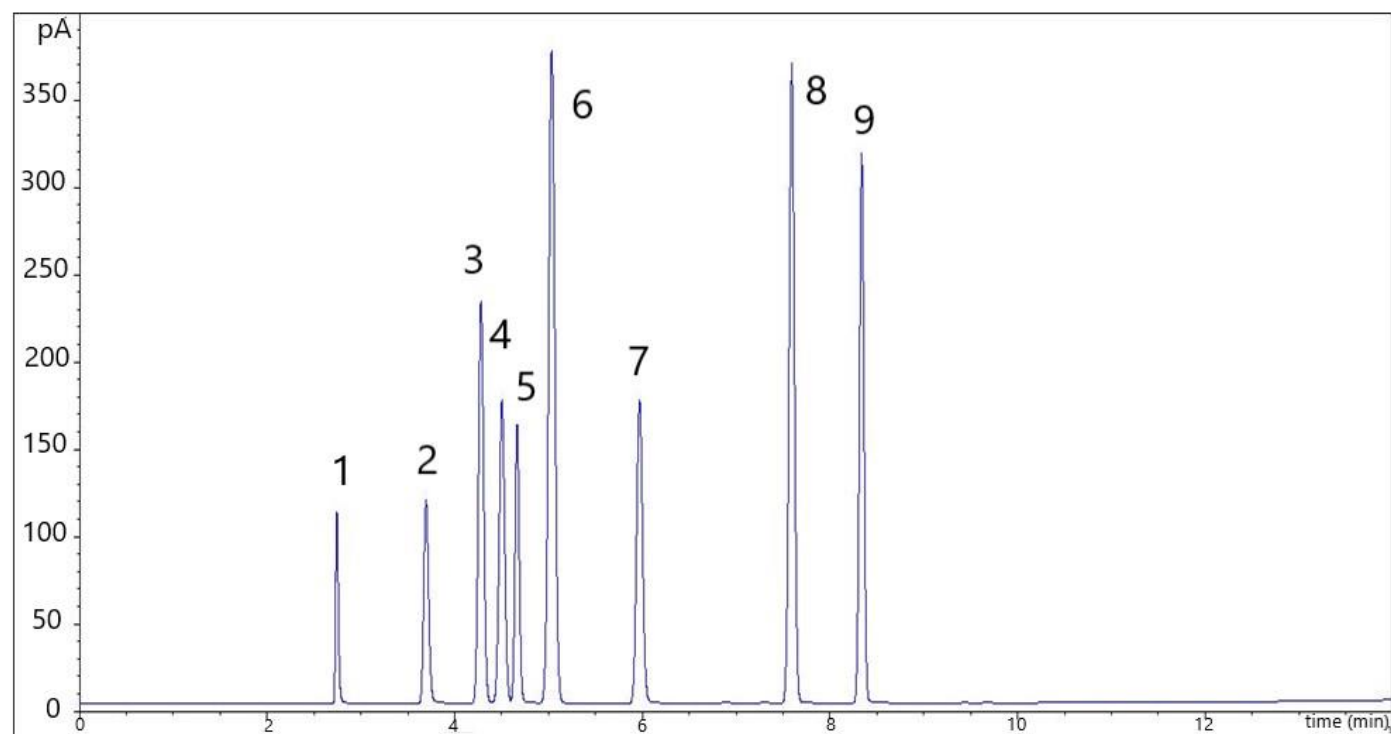

**Figure S3.** Chromatogram of standard solution (0.1 % (V/V)). Legend: methanol (1), ethanol (2), acetone (3), isopropanol (4), acetonitril – internal standard (5), *tert*-butanol (6), 1-propanol (7), isobutanol (8) i 1-butanol (9).
